# Supplementary material for: Symptom reporting, healthcare-seeking behaviour and antibiotic use for common infections: protocol for Bug Watch, a prospective community cohort study
Source: PubMed Central journal article supplement (PMC6537990; doi:10.1136/bmjopen-2018-028676), 2019-05-22
Supplement: bmjopen-2018-028676.draft_revisions.pdf [file bmjopen-2018-028676.draft_revisions.pdf]

# BMJ Open

BMJ Open is committed to open peer review. As part of this commitment we make the peer review history of every article we publish publicly available.

When an article is published we post the peer reviewers' comments and the authors' responses online. We also post the versions of the paper that were used during peer review. These are the versions that the peer review comments apply to.

The versions of the paper that follow are the versions that were submitted during the peer review process. They are not the versions of record or the final published versions. They should not be cited or distributed as the published version of this manuscript.

BMJ Open is an open access journal and the full, final, typeset and author-corrected version of record of the manuscript is available on our site with no access controls, subscription charges or pay-per-view fees (<http://bmjopen.bmj.com>).

If you have any questions on BMJ Open's open peer review process please email [info.bmjopen@bmj.com](mailto:info.bmjopen@bmj.com)

# BMJ Open

## Symptom reporting, healthcare-seeking behaviour and antibiotic use for common infections: protocol for Bug Watch, a prospective community cohort study

|                               |                                                                                                                                                                                                                                                                                                                                                                                                                                                                                                                                                                                                                                                                                                                                                                                                                                                                                                                                                       |
|-------------------------------|-------------------------------------------------------------------------------------------------------------------------------------------------------------------------------------------------------------------------------------------------------------------------------------------------------------------------------------------------------------------------------------------------------------------------------------------------------------------------------------------------------------------------------------------------------------------------------------------------------------------------------------------------------------------------------------------------------------------------------------------------------------------------------------------------------------------------------------------------------------------------------------------------------------------------------------------------------|
| Journal:                      | <i>BMJ Open</i>                                                                                                                                                                                                                                                                                                                                                                                                                                                                                                                                                                                                                                                                                                                                                                                                                                                                                                                                       |
| Manuscript ID                 | bmjopen-2018-028676                                                                                                                                                                                                                                                                                                                                                                                                                                                                                                                                                                                                                                                                                                                                                                                                                                                                                                                                   |
| Article Type:                 | Protocol                                                                                                                                                                                                                                                                                                                                                                                                                                                                                                                                                                                                                                                                                                                                                                                                                                                                                                                                              |
| Date Submitted by the Author: | 19-Dec-2018                                                                                                                                                                                                                                                                                                                                                                                                                                                                                                                                                                                                                                                                                                                                                                                                                                                                                                                                           |
| Complete List of Authors:     | Smith, Catherine; University College London, Institute of Health Informatics<br>Conolly, Anne; NatCen Social Research<br>Fuller, Christopher; University College London, Institute of Health Informatics<br>Hill, Suzanne; NatCen Social Research<br>Lorenatto, F; University College London, Centre for Behaviour Change<br>Marcheselli, Franziska; NatCen Social Research<br>Michie, Susan; University College London, Centre for Behaviour Change<br>Mindell, Jennifer; University College London, Epidemiology & Public Health<br>Ridd, Matthew; University of Bristol, Population Health Science Institute<br>Shallcross, Laura; University College London, Institute of Health Informatics<br>Tsakos, Georgios; University College London, Institute of Epidemiology and Health Care<br>Hayward, Andrew; University College London, Epidemiology and Health Care<br>Fragaszy, Ellen; University College London, Institute of Health Informatics |
| Keywords:                     | Epidemiology < INFECTIOUS DISEASES, INFECTIOUS DISEASES, Public health < INFECTIOUS DISEASES, PRIMARY CARE                                                                                                                                                                                                                                                                                                                                                                                                                                                                                                                                                                                                                                                                                                                                                                                                                                            |
|                               |                                                                                                                                                                                                                                                                                                                                                                                                                                                                                                                                                                                                                                                                                                                                                                                                                                                                                                                                                       |

SCHOLARONE™  
Manuscripts

1  
2  
3 **Symptom reporting, healthcare-seeking behaviour and antibiotic use for common infections:**  
4 **protocol for Bug Watch, a prospective community cohort study**  
5  
6  
7

8 **Authors and affiliations**  
9

10 *On behalf of the Preserving Antibiotics through Safe Stewardship (PASS) study research group:*  
11

12 Catherine M Smith<sup>1</sup>, Anne Conolly<sup>2</sup>, Christopher Fuller<sup>1</sup>, Suzanne Hill<sup>2</sup>, Fabiana Lorencatto<sup>3</sup>, Franziska  
13 Marcheselli<sup>2</sup>, Susan Michie<sup>3</sup>, Jennifer S Mindell<sup>4</sup>, Matthew J Ridd<sup>5</sup>, Laura Shallcross<sup>1</sup>, Georgios Tsakos<sup>6</sup>,  
14 Andrew C Hayward<sup>6</sup>, Ellen B Fragaszy<sup>1</sup>  
15  
16

- 17  
18 1. University College London Institute of Health Informatics  
19  
20 2. NatCen Social Research  
21  
22 3. University College London Centre for Behaviour Change  
23  
24 4. University College London Department of Epidemiology & Public Health  
25  
26 5. Population Health Science Institute, University of Bristol  
27  
28 6. University College London Institute of Epidemiology and Health Care  
29  
30

31 **Corresponding author**  
32

33 Catherine Smith, UCL Institute of Health Informatics, 222 Euston Road, London, NW1 2DA  
34 catherine.m.smith@ucl.ac.uk  
35  
36  
37  
38  
39  
40  
41  
42  
43  
44  
45  
46  
47  
48  
49  
50  
51  
52  
53  
54  
55  
56  
57  
58  
59  
60

## Abstract

### *Introduction*

Antimicrobial resistance is a significant worldwide problem largely driven by selective pressure exerted through antibiotic use. Preserving antibiotics requires identification of opportunities to safely reduce prescriptions, for example in the management of mild common infections. However, more information is needed on how infections are usually managed and what proportion lead to consultation and antibiotic use. The aim of this study is to quantify consultation and prescribing patterns in the community for a range of common acute infection syndromes (respiratory, gastrointestinal, skin/soft tissue, mouth/dental, eye and urinary tract). This will inform development of interventions to improve antibiotic stewardship as part of a larger programme of work, Preserving Antibiotics through Safe Stewardship (PASS).

### *Methods and analysis*

This will be an online prospective community cohort study in England. We will invite 19,510 adults who previously took part in a nationally-representative survey (the Health Survey for England) and consented to be contacted about future studies. Adults will also be asked to register their children. Data collection will consist of a baseline registration survey followed by weekly surveys sent by email for six months. Weekly surveys will collect information on symptoms of common infections, healthcare seeking behaviour, and use of treatments including antibiotics. We will calculate the proportions of infection syndromes that lead to GP consultation and antibiotic prescription. We will investigate how healthcare-seeking and treatment behaviours vary by demographics, social deprivation, infection profiles, and knowledge and attitudes towards antibiotics, and will apply behavioural theory to investigate barriers and enablers to these behaviours.

### *Ethics and dissemination*

This study has been given ethical approval by the UCL Research Ethics Committee (ID 11813/001). Each participant will provide informed consent upon registration. We will disseminate our work through publication in peer-reviewed academic journals. Anonymised data will be made available through the UK Data Service (<https://www.ukdataservice.ac.uk/>).

### **Strengths and limitations of this study**

- This study will use a novel and efficient method for large-scale collection of information about symptoms and related health-seeking behaviours.
- It will address an important aspect of primary care (antibiotic use) by collecting data on a comprehensive set of symptoms of common infections, but will not cover sexually-transmitted infections.
- Collecting data over an entire year will allow seasonal variations to be explored.
- Participants will be recruited from a sample that is representative of the population living in private households in England.
- The prospective community cohort design will enable information to be captured about symptoms irrespective of medical consultation.

## Introduction

The emergence of antimicrobial resistance (AMR) is a significant worldwide problem. It is largely driven by selective pressure exerted through antibiotic use and has led to some infections becoming untreatable with existing antimicrobials.[1] Preserving antibiotics for the future depends on achieving a safe balance between potential population harms of prescribing antibiotics and risks to the individual of not prescribing. The set of actions that promote this responsible use of antibiotics is referred to as antibiotic stewardship.[2]

Improving stewardship requires identification of opportunities to safely reduce prescriptions of antibiotics. An example of this may lie in the management of acute common infections in the community. Respiratory infections are the most common reason for GP consultation, but most patients safely manage these infections without consulting their GP or taking an antibiotic.[3] There is limited information, however, on how the public manage other infections, what proportion lead to consultation and antibiotic use, or how these proportions vary according to infection syndrome or patient characteristics.

The aim of the Bug Watch study is to quantify consultation and antibiotic prescribing patterns in the community for a range of acute common infections (respiratory, gastrointestinal, skin/soft tissue, mouth/dental, eye and urinary tract). Bug Watch is part of a larger programme of work, Preserving Antibiotics through Safe Stewardship (PASS), which aims to inform the development of multifaceted behavioural interventions that will strengthen antibiotic stewardship across a range of healthcare settings. Results from Bug Watch will be synthesised with insights from qualitative interviews to identify opportunities for improved antibiotic stewardship in the community and general practice and inform development of interventions.

## Methods and analysis

### *Study design and setting*

This will be an online prospective community cohort study in England. Data collection will consist of a baseline registration survey followed by weekly surveys for six months. Weekly surveys will collect information on symptoms of common infections, healthcare seeking behaviour, and use of treatments including antibiotics.

### *Recruitment*

We will recruit participants through the Health Survey for England (HSE). HSE is an annual survey first conducted in 1991 that monitors changes in the health and lifestyles of people living in England.[4] It is commissioned by NHS Digital and run by NatCen Social Research and the UCL Research Department of Epidemiology and Public Health. The sample of individuals included in HSE each year is designed to be representative of the population living in private households in England. Full details of the methods for HSE sample have been described previously.[5]

We will invite all adults who took part in the HSE in 2013, 2014 or 2015 and who consented to be contacted about future research studies (with the exception of 50-53 year olds from the 2015 survey who were recruited to a different study). This comprises 19,510 adults, of whom we estimate 15,819 (81%) will still be resident at the address on record when they are contacted. Parents or guardians will

1  
2  
3 be invited to register up to four children aged under sixteen, and all information for children will be  
4 reported by the adult who registered them. Anyone aged sixteen or over living in the same household  
5 will be invited to register separately.  
6

7 Recruitment will be conducted in four waves starting in March, June, September and November 2018.  
8 Initial invitations to take part in Bug Watch will be sent by post. Those who wish to sign up will be  
9 directed to a web link. A second reminder letter will be sent to those who have not registered  
10 approximately three weeks after the initial invitation was sent. Where possible, invitation reminders will  
11 also be sent by email or SMS text message. Individuals who are invited and do not wish to take part in  
12 the study will be removed from contact lists.  
13  
14

### 15 *Participant materials and incentives*

16  
17 The initial invitation letter will include a participant information sheet which will describe the purpose of  
18 the study, what participants will be asked to do, and the contact details of the study team. It will also  
19 include a paper copy of a “symptom diary”, which will be designed to help participants to keep track of  
20 the symptoms of infection that will be collected in the weekly surveys.  
21  
22

23 Study invitations will direct those interested in participating to a UCL web page. This page will include  
24 the registration survey URL as well as a short video describing the study. Those wishing to register  
25 children will also be able to download an information sheet for children. We will design this sheet so  
26 that it is suitable to be read by anyone aged approximately eight years or older. Following registration,  
27 participants will be sent a reusable laminated copy of the symptom diary, a pen, and a Bug Watch-  
28 branded magnet.  
29

30 During follow-up, participants will be sent approximately two email newsletters. These newsletters will  
31 provide updates about the study such as rates of weekly survey completion. To avoid influencing the  
32 behaviour of participants during follow-up, the newsletters will not include details about the main study  
33 outcomes.  
34  
35

36 All participants will receive a £5 voucher to thank them for registering. At the end of follow-up, those  
37 who have completed at least 50% of their weekly surveys will be sent an additional £5 voucher. They will  
38 also be entered into a prize draw to win a further £50 voucher.  
39

### 40 *Data collection*

41  
42 All data will be collected using REDCap electronic data capture tools hosted on the UCL Data Safe  
43 Haven.[6] REDCap (Research Electronic Data Capture) is a secure, web-based application for research  
44 studies. The UCL Data Safe Haven provides a technical solution for storing, handling and analysing  
45 identifiable data. It has been certified to the ISO27001 information security standard and conforms to  
46 NHS Digital’s Information Governance Toolkit. Data analysis will also be conducted within the UCL Data  
47 Safe Haven, from which personal information will not be removed.  
48  
49

50 Online registration will take approximately 15 minutes per person. Participants will be asked to provide  
51 consent, confirming that they have read and understood the information sheets. Parents or legal  
52 guardians will be asked to give formal consent for children under the age of 16. For children that are  
53 able to give assent, the parent or legal guardian will be asked to discuss with them whether they wish to  
54  
55  
56  
57  
58  
59  
60

1  
2  
3 take part or not. Consent for linking data to the broader HSE survey data and for contact for qualitative  
4 interviews will also be requested.  
5

6 Full details of the baseline data collection are shown in Table 1. The baseline survey will collect  
7 information on contact details, demographics, household composition, general health, oral health and  
8 GP consultations. It will also include questions about knowledge and attitudes towards antibiotics,  
9 adapted from Wave 3 of the Wellcome Trust Monitor survey, and the EQ-5D-3L instrument for  
10 measuring health-related quality of life.[7][8] The Wellcome Trust Monitor survey is designed to be  
11 representative of the UK adult population and measures trends in public attitudes towards science.  
12 Wave 3 of the survey, conducted in 2015, included a set of questions about knowledge and attitudes  
13 towards antibiotics. The EQ-5D-3L is a standardised measure of health status developed by the EuroQol  
14 Group that provides a simple, generic measure of health for clinical and economic appraisal.[8]  
15

16  
17  
18 On the first Monday after registration, participants will be sent an email reminding them to start  
19 keeping track of symptoms of infection. Following this, they will be sent weekly emails each Monday  
20 with a link to a survey to fill in details about symptoms from the previous seven days and how they  
21 managed them. These emails will be sent each week for six months, and each survey will be open for  
22 one week. Participants will be given the opportunity to complete feedback forms about Bug Watch after  
23 approximately six weeks of participation, and again after all weekly surveys have been sent.  
24

25  
26 The symptoms that will be monitored in Bug Watch are shown in Table 2. For each day that a symptom  
27 is reported, participants will be asked to rate its severity (mild, moderate or severe) and to complete the  
28 EQ-5D-3L. They will also be asked to report what they did about their symptoms including whether they  
29 took time off work (or school), sought medical advice, or took any treatments. When antibiotics are  
30 reported, further details will be collected about the type of antibiotic, duration, who it was prescribed  
31 by (or how otherwise obtained) and adherence to treatment.  
32

33  
34 At the end of a series of symptoms, participants will be asked to complete a set of questions about what  
35 influenced how they managed their symptoms, specifically whether or not they consulted their GP and  
36 sought antibiotics. We will apply the COM-B (Capability, Motivation, Opportunity, Behaviour) model of  
37 behaviour change [9] to explore the wide-range of potential individual, socio-cultural and environmental  
38 barriers/enablers to these behaviours. The survey will include at least one item mapping onto each  
39 domain of the COM-B model (Table 3). Items will be in the form of belief statements to which  
40 participants rate their agreement on Likert-type scales from 1- Strongly Disagree to 5 - Strongly Agree.  
41

42  
43 In all surveys, we will make use of “skip logic” to ensure that participants are only shown questions that  
44 are relevant to them. For example, they will first be asked if they have any symptoms, and only if they  
45 do will they be shown specific symptom categories. Weekly surveys will therefore take no longer than a  
46 minute if no symptoms are reported, and approximately 5-10 minutes if symptoms are reported.  
47

#### 48 *Statistical analysis*

49

50 We will describe the demographic characteristics of the Bug Watch cohort and assess its  
51 representativeness by comparing with the characteristics of the broader HSE sample and/or published  
52 national statistics. We will also assess the representativeness of the knowledge and attitudes towards  
53 antibiotics of the cohort by comparing with the Wellcome Trust Monitor Survey.[7]  
54  
55  
56  
57  
58  
59

1  
2  
3 Symptoms reported will be combined into infection syndromes. We will create descriptive profiles of  
4 infection syndromes including types of symptom reported, duration, timing and severity. We will  
5 calculate the proportions of infection syndromes that lead to people consulting their GP and receiving  
6 antibiotics. Antibiotic use will be described in terms of type of antibiotic, duration, who it was prescribed  
7 by (or how otherwise obtained) and adherence to treatment. Other health-seeking behaviours,  
8 behavioural influences (barriers and enablers within the COM-B model), and treatments taken to  
9 manage symptoms will also be described.  
10  
11

12 We will use regression methods to investigate how healthcare-seeking and treatment behaviours vary  
13 by age, gender, ethnicity, presence of other illnesses, social deprivation, infection profile, and  
14 knowledge and attitudes towards antibiotics. We will also assess the impact of different types of  
15 infection on quality of life using the EQ5D-3L scores, and on reported work and school absences. We will  
16 use these measures to estimate the overall impact of community infection at the population level. Full  
17 statistical methods will be presented with relevant analyses.  
18  
19

### 20 *Patient and public involvement*

21

22 Participants were not directly involved in design of this study although feedback will be collected at two  
23 time points during follow up. Newsletters will be sent to give participants updates during the study, and  
24 a summary of the main findings will be available at the end. As part of the wider PASS study, a subset of  
25 participants will be invited to take part in qualitative interviews that will draw on behavioural theory to  
26 investigate the drivers of health-seeking behaviours. Findings from Bug Watch and the related  
27 interviews will inform stakeholder panels to develop stewardship interventions through a user-centred  
28 design approach.  
29  
30

### 31 **Ethics and dissemination**

32

33 This study has been given ethical approval by the UCL Research Ethics Committee (ID 11813/001). Each  
34 participant will provide informed consent upon registration. We will disseminate our work through  
35 publication in peer-reviewed academic journals and presentation at conferences. Findings will  
36 contribute to interventions and educational materials developed through the wider PASS study.  
37 Anonymised data from Bug Watch will be made available through the UK Data Service  
38 (<https://www.ukdataservice.ac.uk/>) for use by other researchers.  
39  
40  
41  
42  
43  
44  
45  
46  
47  
48  
49  
50  
51  
52  
53  
54  
55  
56  
57  
58  
59  
60



## References

- 1 World Health Organization, Food and Agriculture Organization of the United Nations, Health WO for A. Monitoring global progress on addressing antimicrobial resistance: analysis report of the second round of results of AMR country self-assessment survey 2018. 2018. <http://apps.who.int/iris/bitstream/handle/10665/273128/9789241514422-eng.pdf?ua=1> (accessed 18 Dec 2018).
- 2 Dyar OJ, Huttner B, Schouten J, *et al.* What is antimicrobial stewardship? *Clin Microbiol Infect* 2017;**23**:793. doi:10.1016/j.cmi.2017.08.026
- 3 Hayward AC, Fragaszy EB, Bermingham A, *et al.* Comparative community burden and severity of seasonal and pandemic influenza: results of the Flu Watch cohort study. *Lancet Respir Med* 2014;**2**:445–54. doi:10.1016/S2213-2600(14)70034-7
- 4 NHS Digital. Health Survey for England - Health, social care and lifestyles - NHS Digital. <https://digital.nhs.uk/data-and-information/areas-of-interest/public-health/health-survey-for-england-health-social-care-and-lifestyles> (accessed 20 Nov 2018).
- 5 NatCen Social Research and UCL. Health Survey for England 2016 Methods. 2017. <https://files.digital.nhs.uk/publication/m/3/hse2016-methods-text.pdf> (accessed 20 Nov 2018).
- 6 Harris PA, Taylor R, Thielke R, *et al.* Research electronic data capture (REDCap)—A metadata-driven methodology and workflow process for providing translational research informatics support. *J Biomed Inform* 2009;**42**:377–81. doi:10.1016/J.JBI.2008.08.010
- 7 Ipsos Mori. Wellcome Trust Monitor Report Wave 3. London: 2016. doi:10.6084/m9.figshare.3145744
- 8 EuroQol Group. EuroQol—a new facility for the measurement of health-related quality of life. *Health Policy* 1990;**16**:199–208. <http://www.ncbi.nlm.nih.gov/pubmed/10109801> (accessed 20 Nov 2018).
- 9 Michie S, van Stralen MM, West R. The behaviour change wheel: a new method for characterising and designing behaviour change interventions. *Implement Sci* 2011;**6**:42. doi:10.1186/1748-5908-6-42

### Authors' contributions

Written on behalf of the Preserving Antibiotics through Safe Stewardship (PASS) study research group. CMS is responsible for data collection, management and analysis, and drafted the protocol. ACH, EBF, and the PASS study investigators developed the concept for the study. All authors contributed to the study design and development of the questionnaires. AC, FM and SH led recruitment. All authors have checked and approved the protocol to be published.

### Funding statement

This work is supported by the Economic and Social Research Council, grant number ES/P008321/1, as part of the Preserving Antibiotics through Safe Stewardship (PASS) project. MJR is funded by an NIHR Post-Doctoral Research Fellowship (PDF-2014-07-013). The views expressed in this publication are those of the authors and not necessarily those of the NHS, the National Institute for Health Research or the Department of Health and Social Care.

### Competing interests

None declared.

**Word count** 2068

**Table 1:** Baseline data collection

| Section               | Fields included                                                                                                                                                                                                                                                                                                                                                                                                                                                                                                          |
|-----------------------|--------------------------------------------------------------------------------------------------------------------------------------------------------------------------------------------------------------------------------------------------------------------------------------------------------------------------------------------------------------------------------------------------------------------------------------------------------------------------------------------------------------------------|
| Consent               | <ul style="list-style-type: none"> <li>• Consent to participate in Bug Watch (required)</li> <li>• Permission to be contacted for qualitative interviews; for data to be linked to the Health Survey for England; to be contacted about a urinary tract infection sub-study (optional)</li> </ul>                                                                                                                                                                                                                        |
| Contact details       | <ul style="list-style-type: none"> <li>• ID number (from invitation letter)</li> <li>• Name</li> <li>• Email address</li> <li>• Postal address</li> </ul>                                                                                                                                                                                                                                                                                                                                                                |
| Demographics          | <ul style="list-style-type: none"> <li>• Date of birth</li> <li>• Sex</li> <li>• Country of birth</li> <li>• Ethnic group</li> <li>• Work status (employed, in education, unemployed, retired, etc.)</li> <li>• Full or part time work</li> <li>• Is a healthcare worker</li> </ul>                                                                                                                                                                                                                                      |
| General health        | <ul style="list-style-type: none"> <li>• Long term illnesses or health problems</li> <li>• Recurrent urinary tract infections</li> <li>• Currently pregnant; which trimester</li> <li>• Smoking status</li> <li>• Seasonal influenza vaccine in the last year</li> <li>• EQ-5D-3L</li> </ul>                                                                                                                                                                                                                             |
| GP consultations      | <ul style="list-style-type: none"> <li>• Number of GP consultations in last 12 months</li> </ul>                                                                                                                                                                                                                                                                                                                                                                                                                         |
| Antibiotics           | <ul style="list-style-type: none"> <li>• Ever been prescribed antibiotics; number in last 12 months</li> <li>• Ever been prescribed antibiotics but thought it was not the right treatment</li> <li>• When last took antibiotics; were they prescribed (if not, where from); were all taken</li> <li>• Ever asked for an antibiotic prescription; was it given; needed to persuade</li> <li>• Which conditions think can be treated with antibiotics</li> <li>• Understanding of term "antibiotic resistance"</li> </ul> |
| Oral health           | <ul style="list-style-type: none"> <li>• Rate dental health (global item)</li> <li>• Has dentures</li> <li>• Dental symptoms in last 12 months</li> <li>• Problems caused by mouth/ teeth/ dentures in last 12 months (impact on quality of life)</li> </ul>                                                                                                                                                                                                                                                             |
| Household composition | <ul style="list-style-type: none"> <li>• Number of adults (aged 16+)</li> <li>• Number of children, number to be registered (up to 4)</li> </ul>                                                                                                                                                                                                                                                                                                                                                                         |

NB: Questions are filtered and adapted based on previous responses so that they are only shown to participants when relevant. For example, "Currently pregnant" is not shown if sex is given as male.

**Table 2** Symptoms of infection to be collected in Bug Watch

| <b>Respiratory</b>     | <b>Gastrointestinal</b> | <b>Eye</b>     | <b>Urinary tract</b>       | <b>Skin/ soft tissue</b> | <b>Mouth/ dental</b> | <b>General/ non-specific</b> |
|------------------------|-------------------------|----------------|----------------------------|--------------------------|----------------------|------------------------------|
| Runny nose             | Nausea                  | Red eye        | Painful urination          | Rash (general)           | Toothache            | Fever                        |
| Blocked nose           | Vomiting                | Conjunctivitis | Frequent urination         | Rash (local)             | Mouth ulcer          | Chills                       |
| Sneezing               | Stomach/ abdominal pain | Stye           | Urgent urination           | Itchy (general)          | Gum abscess          | Muscle aches                 |
| Dry cough              | Diarrhoea               |                |                            | Itchy (local)            |                      | Night sweats                 |
| Coughing up phlegm     |                         |                | Cloudy/ dark/ smelly urine | Boils/ abscesses         |                      | Fatigue                      |
| Short of breath        |                         |                | Blood in urine             | Infected wound/ cut      |                      | Headache                     |
| Ear ache/ pain         |                         |                | Bladder pain               | Mastitis                 |                      | Migraine                     |
| Fluid leaking from ear |                         |                | Kidney pain                | Chicken pox              |                      | Loss of appetite             |
| Sinus pain/ congestion |                         |                |                            | Shingles                 |                      |                              |

**Table 3:** Example items exploring barriers/enablers to GP consulting and antibiotic seeking behaviours, based on the COM-B model of behaviour change [9] (asked at the end of a series of symptoms in Bug Watch)

| COM-B Domain               | Example barrier/enabler belief statements                                                                                                                                                            |
|----------------------------|------------------------------------------------------------------------------------------------------------------------------------------------------------------------------------------------------|
| Capability (psychological) | <p>'I thought antibiotics would be effective in treating my symptoms'</p> <p>'I did not know what other treatments were available'</p>                                                               |
| Capability (physical)      | <p>'I felt too unwell to travel to the GP practice'</p>                                                                                                                                              |
| Opportunity (social)       | <p>'I was encouraged by others to go see my GP'</p> <p>'My GP discussed alternatives ways of managing my symptoms'</p> <p>'I was involved in the decision of whether or not to take antibiotics'</p> |
| Opportunity (physical)     | <p>'I was unable to take time off work to recover without taking antibiotics'</p> <p>'Other treatments were too expensive'</p> <p>'It was easy to get a GP appointment'</p>                          |
| Motivation (reflective)    | <p>'I felt confident in safely treating my symptoms without antibiotics'</p> <p>'I did not think I would get better as quickly without antibiotics'</p>                                              |
| Motivation (automatic)     | <p>'I was worried about my symptoms'</p> <p>'I always go see my GP when I have these types of symptoms'</p> <p>'I felt reassured that I could safely manage my symptoms without antibiotics'</p>     |

STROBE Statement—Checklist of items that should be included in reports of *cohort studies*

|                              | Item No | Recommendation                                                                                                                                                                                                     |
|------------------------------|---------|--------------------------------------------------------------------------------------------------------------------------------------------------------------------------------------------------------------------|
| <b>Title and abstract</b>    | 1       | (a) Indicate the study's design with a commonly used term in the title or the abstract <b>p1</b>                                                                                                                   |
|                              |         | (b) Provide in the abstract an informative and balanced summary of what was done and what was found <b>p2</b>                                                                                                      |
| <b>Introduction</b>          |         |                                                                                                                                                                                                                    |
| Background/rationale         | 2       | Explain the scientific background and rationale for the investigation being reported <b>p3</b>                                                                                                                     |
| Objectives                   | 3       | State specific objectives, including any prespecified hypotheses <b>p3</b>                                                                                                                                         |
| <b>Methods</b>               |         |                                                                                                                                                                                                                    |
| Study design                 | 4       | Present key elements of study design early in the paper <b>p3</b>                                                                                                                                                  |
| Setting                      | 5       | Describe the setting, locations, and relevant dates, including periods of recruitment, exposure, follow-up, and data collection <b>p3,4,5</b>                                                                      |
| Participants                 | 6       | (a) Give the eligibility criteria, and the sources and methods of selection of participants. Describe methods of follow-up <b>p3,4,5</b>                                                                           |
|                              |         | (b) For matched studies, give matching criteria and number of exposed and unexposed <b>NA</b>                                                                                                                      |
| Variables                    | 7       | Clearly define all outcomes, exposures, predictors, potential confounders, and effect modifiers. Give diagnostic criteria, if applicable <b>p4,5, Table 1, Table 2</b>                                             |
| Data sources/<br>measurement | 8*      | For each variable of interest, give sources of data and details of methods of assessment (measurement). Describe comparability of assessment methods if there is more than one group <b>p4,5, Table 1, Table 2</b> |
| Bias                         | 9       | Describe any efforts to address potential sources of bias <b>p5,6</b>                                                                                                                                              |
| Study size                   | 10      | Explain how the study size was arrived at <b>p3</b>                                                                                                                                                                |
| Quantitative variables       | 11      | Explain how quantitative variables were handled in the analyses. If applicable, describe which groupings were chosen and why <b>p5</b>                                                                             |
| Statistical methods          | 12      | (a) Describe all statistical methods, including those used to control for confounding                                                                                                                              |
|                              |         | (b) Describe any methods used to examine subgroups and interactions                                                                                                                                                |
|                              |         | (c) Explain how missing data were addressed                                                                                                                                                                        |
|                              |         | (d) If applicable, explain how loss to follow-up was addressed                                                                                                                                                     |
|                              |         | (e) Describe any sensitivity analyses                                                                                                                                                                              |
| <b>Results - NA</b>          |         |                                                                                                                                                                                                                    |
| Participants                 | 13*     | (a) Report numbers of individuals at each stage of study—eg numbers potentially eligible, examined for eligibility, confirmed eligible, included in the study, completing follow-up, and analysed                  |
|                              |         | (b) Give reasons for non-participation at each stage                                                                                                                                                               |
|                              |         | (c) Consider use of a flow diagram                                                                                                                                                                                 |
| Descriptive data             | 14*     | (a) Give characteristics of study participants (eg demographic, clinical, social) and information on exposures and potential confounders                                                                           |
|                              |         | (b) Indicate number of participants with missing data for each variable of interest                                                                                                                                |
|                              |         | (c) Summarise follow-up time (eg, average and total amount)                                                                                                                                                        |
| Outcome data                 | 15*     | Report numbers of outcome events or summary measures over time                                                                                                                                                     |
| Main results                 | 16      | (a) Give unadjusted estimates and, if applicable, confounder-adjusted estimates and their precision (eg, 95% confidence interval). Make clear which confounders were adjusted for and why they were included       |

|    |                          |                                                                                         |
|----|--------------------------|-----------------------------------------------------------------------------------------|
| 1  |                          | (b) Report category boundaries when continuous variables were categorized               |
| 2  |                          | (c) If relevant, consider translating estimates of relative risk into absolute risk for |
| 3  |                          | a meaningful time period                                                                |
| 4  |                          |                                                                                         |
| 5  | Other analyses           | 17 Report other analyses done—eg analyses of subgroups and interactions, and            |
| 6  |                          | sensitivity analyses                                                                    |
| 7  |                          |                                                                                         |
| 8  | <b>Discussion - NA</b>   |                                                                                         |
| 9  | Key results              | 18 Summarise key results with reference to study objectives                             |
| 10 | Limitations              | 19 Discuss limitations of the study, taking into account sources of potential bias or   |
| 11 |                          | imprecision. Discuss both direction and magnitude of any potential bias                 |
| 12 |                          |                                                                                         |
| 13 | Interpretation           | 20 Give a cautious overall interpretation of results considering objectives,            |
| 14 |                          | limitations, multiplicity of analyses, results from similar studies, and other          |
| 15 |                          | relevant evidence                                                                       |
| 16 |                          |                                                                                         |
| 17 | Generalisability         | 21 Discuss the generalisability (external validity) of the study results                |
| 18 |                          |                                                                                         |
| 19 | <b>Other information</b> |                                                                                         |
| 20 | Funding                  | 22 Give the source of funding and the role of the funders for the present study and, if |
| 21 |                          | applicable, for the original study on which the present article is based p8             |
| 22 |                          |                                                                                         |

\*Give information separately for exposed and unexposed groups.

**Note:** An Explanation and Elaboration article discusses each checklist item and gives methodological background and published examples of transparent reporting. The STROBE checklist is best used in conjunction with this article (freely available on the Web sites of PLoS Medicine at <http://www.plosmedicine.org/>, Annals of Internal Medicine at <http://www.annals.org/>, and Epidemiology at <http://www.epidem.com/>). Information on the STROBE Initiative is available at <http://www.strobe-statement.org>.

# BMJ Open

## Symptom reporting, healthcare-seeking behaviour and antibiotic use for common infections: protocol for Bug Watch, a prospective community cohort study

|                                 |                                                                                                                                                                                                                                                                                                                                                                                                                                                                                                                                                                                                                                                                                                                                                                                                                                                                                                                                                       |
|---------------------------------|-------------------------------------------------------------------------------------------------------------------------------------------------------------------------------------------------------------------------------------------------------------------------------------------------------------------------------------------------------------------------------------------------------------------------------------------------------------------------------------------------------------------------------------------------------------------------------------------------------------------------------------------------------------------------------------------------------------------------------------------------------------------------------------------------------------------------------------------------------------------------------------------------------------------------------------------------------|
| Journal:                        | <i>BMJ Open</i>                                                                                                                                                                                                                                                                                                                                                                                                                                                                                                                                                                                                                                                                                                                                                                                                                                                                                                                                       |
| Manuscript ID                   | bmjopen-2018-028676.R1                                                                                                                                                                                                                                                                                                                                                                                                                                                                                                                                                                                                                                                                                                                                                                                                                                                                                                                                |
| Article Type:                   | Protocol                                                                                                                                                                                                                                                                                                                                                                                                                                                                                                                                                                                                                                                                                                                                                                                                                                                                                                                                              |
| Date Submitted by the Author:   | 05-Mar-2019                                                                                                                                                                                                                                                                                                                                                                                                                                                                                                                                                                                                                                                                                                                                                                                                                                                                                                                                           |
| Complete List of Authors:       | Smith, Catherine; University College London, Institute of Health Informatics<br>Conolly, Anne; NatCen Social Research<br>Fuller, Christopher; University College London, Institute of Health Informatics<br>Hill, Suzanne; NatCen Social Research<br>Lorenatto, F; University College London, Centre for Behaviour Change<br>Marcheselli, Franziska; NatCen Social Research<br>Michie, Susan; University College London, Centre for Behaviour Change<br>Mindell, Jennifer; University College London, Epidemiology & Public Health<br>Ridd, Matthew; University of Bristol, Population Health Science Institute<br>Shallcross, Laura; University College London, Institute of Health Informatics<br>Tsakos, Georgios; University College London, Institute of Epidemiology and Health Care<br>Hayward, Andrew; University College London, Epidemiology and Health Care<br>Fragaszy, Ellen; University College London, Institute of Health Informatics |
| <b>Primary Subject Heading</b>: | Epidemiology                                                                                                                                                                                                                                                                                                                                                                                                                                                                                                                                                                                                                                                                                                                                                                                                                                                                                                                                          |
| Secondary Subject Heading:      | Infectious diseases, Public health                                                                                                                                                                                                                                                                                                                                                                                                                                                                                                                                                                                                                                                                                                                                                                                                                                                                                                                    |
| Keywords:                       | Epidemiology < INFECTIOUS DISEASES, INFECTIOUS DISEASES, Public health < INFECTIOUS DISEASES, PRIMARY CARE                                                                                                                                                                                                                                                                                                                                                                                                                                                                                                                                                                                                                                                                                                                                                                                                                                            |
|                                 |                                                                                                                                                                                                                                                                                                                                                                                                                                                                                                                                                                                                                                                                                                                                                                                                                                                                                                                                                       |

SCHOLARONE™  
Manuscripts



1  
2  
3 **Symptom reporting, healthcare-seeking behaviour and antibiotic use for common infections:**  
4 **protocol for Bug Watch, a prospective community cohort study**  
5  
6  
7

8 **Authors and affiliations**  
9

10 *On behalf of the Preserving Antibiotics through Safe Stewardship (PASS) study research group:*  
11

12 Catherine M Smith<sup>1</sup>, Anne Conolly<sup>2</sup>, Christopher Fuller<sup>1</sup>, Suzanne Hill<sup>2</sup>, Fabiana Lorencatto<sup>3</sup>, Franziska  
13 Marcheselli<sup>2</sup>, Susan Michie<sup>3</sup>, Jennifer S Mindell<sup>4</sup>, Matthew J Ridd<sup>5</sup>, Laura Shallcross<sup>1</sup>, Georgios Tsakos<sup>6</sup>,  
14 Andrew C Hayward<sup>6</sup>, Ellen B Fragaszy<sup>1</sup>  
15  
16

- 17  
18 1. University College London Institute of Health Informatics  
19  
20 2. NatCen Social Research  
21  
22 3. University College London Centre for Behaviour Change  
23  
24 4. University College London Department of Epidemiology & Public Health  
25  
26 5. Population Health Science Institute, University of Bristol  
27  
28 6. University College London Institute of Epidemiology and Health Care  
29  
30

31 **Corresponding author**  
32

33 Catherine Smith, UCL Institute of Health Informatics, 222 Euston Road, London, NW1 2DA  
34 catherine.m.smith@ucl.ac.uk  
35  
36  
37  
38  
39  
40  
41  
42  
43  
44  
45  
46  
47  
48  
49  
50  
51  
52  
53  
54  
55  
56  
57  
58  
59  
60

## Abstract

### *Introduction*

Antimicrobial resistance is a significant worldwide problem largely driven by selective pressure exerted through antibiotic use. Preserving antibiotics requires identification of opportunities to safely reduce prescriptions, for example in the management of mild common infections in the community. However, more information is needed on how infections are usually managed and what proportion lead to consultation and antibiotic use. The aim of this study is to quantify consultation and prescribing patterns in the community for a range of common acute infection syndromes (respiratory, gastrointestinal, skin/soft tissue, mouth/dental, eye and urinary tract). This will inform development of interventions to improve antibiotic stewardship as part of a larger programme of work, Preserving Antibiotics through Safe Stewardship (PASS).

### *Methods and analysis*

This will be an online prospective community cohort study in England. We will invite 19,510 adults who previously took part in a nationally-representative survey (the Health Survey for England) and consented to be contacted about future studies. Adults will also be asked to register their children. Data collection will consist of a baseline registration survey followed by weekly surveys sent by email for six months. Weekly surveys will collect information on symptoms of common infections, healthcare-seeking behaviour, and use of treatments including antibiotics. We will calculate the proportions of infection syndromes that lead to GP consultation and antibiotic prescription. We will investigate how healthcare-seeking and treatment behaviours vary by demographics, social deprivation, infection profiles, and knowledge and attitudes towards antibiotics, and will apply behavioural theory to investigate barriers and enablers to these behaviours.

### *Ethics and dissemination*

This study has been given ethical approval by the UCL Research Ethics Committee (ID 11813/001). Each participant will provide informed consent upon registration. We will disseminate our work through publication in peer-reviewed academic journals. Anonymised data will be made available through the UK Data Service (<https://www.ukdataservice.ac.uk/>).

### **Strengths and limitations of this study**

- This study will use a novel and efficient method for large-scale collection of information about symptoms and related healthcare-seeking behaviours.
- It will address an important aspect of primary care (antibiotic use) by collecting data on a comprehensive set of symptoms of common infections, but will not cover sexually-transmitted infections.
- Collecting data over an entire year will allow seasonal variations to be explored.
- Participants will be recruited from a sample that is representative of the population living in private households in England.
- The prospective community cohort design will enable information to be captured about symptoms irrespective of medical consultation.

## Introduction

The emergence of antimicrobial resistance (AMR) is a significant worldwide problem. It is largely driven by selective pressure exerted through antibiotic use and has led to some infections becoming untreatable with existing antimicrobials.[1] Preserving antibiotics for the future depends on achieving a safe balance between potential population harms of prescribing antibiotics and risks to the individual of not prescribing. The set of actions that promote this responsible use of antibiotics is referred to as antibiotic stewardship.[2]

Improving stewardship requires identification of opportunities to safely reduce prescriptions of antibiotics. Although overprescribing of antibiotics for patients presenting at primary care with common infections has been widely reported,[3] there is also evidence for a significant clinical “iceberg” of infection.[4,5] For example, previous studies have shown that most patients safely manage respiratory and gastrointestinal symptoms without consulting their GP or taking an antibiotic.[4,5] This suggests that inappropriate antibiotic prescriptions could be reduced through improved management of common infections and associated symptoms in the community. There is limited information, however, on how the public manage symptoms of other infections, what proportion of infections lead to consultation and antibiotic use, or how these rates vary according to type of symptoms or patient characteristics. Establishing this requires information to be captured on patients in the community, including those who do not seek healthcare, and identification of healthcare-seeking behaviours, ideally through prospective follow-up.

The aim of the Bug Watch study is to quantify consultation and antibiotic prescribing patterns in the community for a range of acute common infections (respiratory, gastrointestinal, skin/soft tissue, mouth/dental, eye and urinary tract). Bug Watch is part of a larger programme of work, Preserving Antibiotics through Safe Stewardship (PASS), which aims to inform the development of multifaceted behavioural interventions that will strengthen antibiotic stewardship across a range of healthcare settings. Results from Bug Watch will be synthesised with insights from qualitative interviews to identify opportunities for improved antibiotic stewardship in the community and general practice and inform development of interventions.

## Methods and analysis

### *Study design and setting*

This will be an online prospective community cohort study in England. Data collection will consist of a baseline registration survey followed by weekly surveys for six months. Weekly surveys will collect information on symptoms of common infections, healthcare-seeking behaviour, and use of treatments including antibiotics.

### *Recruitment*

We will recruit participants through the Health Survey for England (HSE). HSE is an annual survey first conducted in 1991 that monitors changes in the health and lifestyles of people living in England.[6] It is commissioned by NHS Digital and run by NatCen Social Research and the UCL Research Department of Epidemiology and Public Health. The sample of individuals included in HSE each year is designed to be representative of the population living in private households in England. Full details of the methods for HSE sample have been described previously.[7]

1  
2  
3 We will invite all adults who took part in the HSE in 2013, 2014 or 2015 and who consented to be  
4 contacted about future research studies (with the exception of 50-53 year olds from the 2015 survey  
5 who were recruited to a different study). This comprises 19,510 adults, of whom we estimate 15,819  
6 (81%) will still be resident at the address on record when they are contacted. Parents or guardians will  
7 be invited to register up to four children aged under sixteen, and all information for children will be  
8 reported by the adult who registered them. Anyone aged sixteen or over living in the same household  
9 will be invited to register separately.  
10  
11

12 Recruitment will be conducted in four waves starting in March, June, September and November 2018.  
13 Initial invitations to take part in Bug Watch will be sent by post. Those who wish to sign up will be  
14 directed to a web link. A second reminder letter will be sent to those who have not registered  
15 approximately three weeks after the initial invitation was sent. Where possible, invitation reminders will  
16 also be sent by email or SMS text message. Individuals who are invited and do not wish to take part in  
17 the study will be removed from contact lists.  
18  
19

#### 20 *Participant materials and incentives*

21

22 The initial invitation letter will include a participant information sheet which will describe the purpose of  
23 the study, what participants will be asked to do, and the contact details of the study team. It will also  
24 include a paper copy of a “symptom diary”, which will be designed to help participants to keep track of  
25 the symptoms of infection that will be collected in the weekly surveys.  
26

27 Study invitations will direct those interested in participating to a UCL web page. This page will include  
28 the registration survey URL as well as a short video describing the study. Those wishing to register  
29 children will also be able to download an information sheet for children. We will design this sheet so  
30 that it is suitable to be read by anyone aged approximately eight years or older. Following registration,  
31 participants will be sent a reusable laminated copy of the symptom diary, a pen, and a Bug Watch-  
32 branded magnet.  
33  
34

35 During follow-up, participants will be sent two email newsletters. These newsletters will provide  
36 updates about the study such as rates of weekly survey completion. To avoid influencing the behaviour  
37 of participants during follow-up, the newsletters will not include details about the main study outcomes.  
38  
39

40 All participants will receive a £5 voucher to thank them for registering. At the end of follow-up, those  
41 who have completed at least 50% of their weekly surveys will be sent an additional £5 voucher to thank  
42 them for participating. They will also be entered into a prize draw to win a further £50 voucher.  
43

#### 44 *Data collection*

45

46 All data will be collected using REDCap electronic data capture tools hosted on the UCL Data Safe  
47 Haven.[8] REDCap (Research Electronic Data Capture) is a secure, web-based application for research  
48 studies. The UCL Data Safe Haven provides a technical solution for storing, handling and analysing  
49 identifiable data. It has been certified to the ISO27001 information security standard and conforms to  
50 NHS Digital’s Information Governance Toolkit. Data analysis will also be conducted within the UCL Data  
51 Safe Haven, from which personal information will not be removed.  
52  
53

54 Online registration will take approximately 15 minutes per person. Participants will be asked to provide  
55 consent, confirming that they have read and understood the information sheets. Parents or legal  
56  
57  
58  
59

guardians will be asked to give formal consent for children under the age of 16. For children that are able to give assent, the parent or legal guardian will be asked to discuss with them whether they wish to take part or not. Consent for linking data to the broader HSE survey data and for contact for qualitative interviews will also be requested.

Full details of the baseline data collection are shown in Table 1. The baseline survey will collect information on contact details, demographics, household composition, general health, oral health and GP consultations. It will also include questions about knowledge and attitudes towards antibiotics, adapted from Wave 3 of the Wellcome Trust Monitor survey, and the EQ-5D-3L instrument for measuring health-related quality of life.[9][10] The Wellcome Trust Monitor survey is designed to be representative of the UK adult population and measures trends in public attitudes towards science. Wave 3 of the survey, conducted in 2015, included a set of questions about knowledge and attitudes towards antibiotics. The EQ-5D-3L is a standardised measure of health status developed by the EuroQol Group that provides a simple, generic measure of health for clinical and economic appraisal.[10]

On the first Monday after registration, participants will be sent an email reminding them to start keeping track of symptoms of infection. Following this, they will be sent weekly emails each Monday with a link to a survey to fill in details about symptoms from the previous seven days and how they managed them. These emails will be sent each week for six months, and each survey will be open for one week. One reminder email will be sent on the Thursday of each week if the survey has not been completed. Participants will be given the opportunity to complete feedback forms about Bug Watch after approximately six weeks of participation, and again after all weekly surveys have been sent.

The symptoms that will be monitored in Bug Watch are shown in Table 2. For each day that a symptom is reported, participants will be asked to rate its severity (mild, moderate or severe) and to complete the EQ-5D-3L. They will also be asked to report what they did about their symptoms including whether they took time off work (or school), sought medical advice, or took any treatments. When antibiotics are reported, further details will be collected about the type of antibiotic, duration, who it was prescribed by (or how otherwise obtained) and adherence to treatment.

At the end of a series of symptoms, participants will be asked to complete a set of questions about what influenced how they managed their symptoms, specifically whether or not they consulted their GP and sought antibiotics. We will apply the COM-B (Capability, Motivation, Opportunity, Behaviour) model of behaviour change [11] to explore the wide-range of potential individual, socio-cultural and environmental barriers/enablers to these behaviours. The survey will include at least one item mapping onto each domain of the COM-B model (Table 3). Items will be in the form of belief statements to which participants rate their agreement on Likert-type scales from 1- Strongly Disagree to 5 - Strongly Agree.

In all surveys, we will make use of “skip logic” to ensure that participants are only shown questions that are relevant to them. For example, they will first be asked if they have any symptoms, and only if they do will they be shown specific symptom categories. Weekly surveys will therefore take no longer than a minute if no symptoms are reported, and approximately 5-10 minutes if symptoms are reported.

### *Statistical analysis*

We will describe the demographic characteristics of the Bug Watch cohort and assess its representativeness by comparing with the characteristics of the broader HSE sample and published

1  
2  
3 national statistics. We will also assess the representativeness of the knowledge and attitudes towards  
4 antibiotics of the cohort by comparing with the Wellcome Trust Monitor Survey.[9]  
5

6 Symptoms reported will be combined into infection syndromes (i.e., combinations of symptoms  
7 associated with an episode of infection). We will create descriptive profiles of infection syndromes  
8 including types of symptom reported, duration, timing and severity. We will calculate the proportions of  
9 infection syndromes that lead to people consulting their GP and receiving antibiotics. Antibiotic use will  
10 be described in terms of type of antibiotic, duration, who it was prescribed by (or how otherwise  
11 obtained) and adherence to treatment. Other healthcare-seeking behaviours, behavioural influences  
12 (barriers and enablers within the COM-B model), and treatments taken to manage symptoms will also  
13 be described.  
14  
15

16 We will use Poisson regression to calculate rates of infection, consultation and antibiotic prescribing.  
17 These analyses will be weighted by the population structure of England, and will account for the  
18 clustered nature of the data. We will use logistic regression to investigate how GP consultation and  
19 antibiotic prescribing varies by age, gender, ethnicity, presence of other illnesses, social deprivation,  
20 infection syndrome, and knowledge and attitudes towards antibiotics. Continuous variables will be  
21 converted into categorical variables. We will also assess the impact of different types of infection on  
22 quality of life using the EQ5D-3L scores, and on reported work and school absences. We will use these  
23 measures to estimate the overall impact of community infection at the population level. Full statistical  
24 methods will be presented with relevant analyses.  
25  
26  
27

### 28 *Patient and public involvement*

29

30 Participants were not directly involved in design of this study although feedback will be collected at two  
31 time points during follow up. Newsletters will be sent to give participants updates during the study, and  
32 a summary of the main findings will be available at the end. As part of the wider PASS study, a subset of  
33 participants will be invited to take part in qualitative interviews that will draw on behavioural theory to  
34 investigate the drivers of healthcare-seeking behaviours (full methods will be published elsewhere).  
35 Findings from Bug Watch and the related interviews will inform stakeholder panels to develop  
36 stewardship interventions through a user-centred design approach.  
37  
38

### 39 **Ethics and dissemination**

40

41 This study has been given ethical approval by the UCL Research Ethics Committee (ID 11813/001). Each  
42 participant will provide informed consent upon registration. We will disseminate our work through  
43 publication in peer-reviewed academic journals and presentation at conferences. Findings will  
44 contribute to interventions and educational materials developed through the wider PASS study.  
45 Anonymised data from Bug Watch will be made available through the UK Data Service  
46 (<https://www.ukdataservice.ac.uk/>) for use by other researchers.  
47  
48  
49  
50  
51  
52  
53  
54  
55  
56  
57  
58  
59  
60

## References

- 1 World Health Organization, Food and Agriculture Organization of the United Nations, Health WO for A. Monitoring global progress on addressing antimicrobial resistance: analysis report of the second round of results of AMR country self-assessment survey 2018. 2018. <http://apps.who.int/iris/bitstream/handle/10665/273128/9789241514422-eng.pdf?ua=1> (accessed 18 Dec 2018).
- 2 Dyar OJ, Huttner B, Schouten J, *et al.* What is antimicrobial stewardship? *Clin Microbiol Infect* 2017;**23**:793. doi:10.1016/j.cmi.2017.08.026
- 3 Pouwels KB, Dolk FCK, Smith DRM, *et al.* Actual versus 'ideal' antibiotic prescribing for common conditions in English primary care. *J Antimicrob Chemother* 2018;**73**:19–26. doi:10.1093/jac/dkx502
- 4 Hayward AC, Fragaszy EB, Bermingham A, *et al.* Comparative community burden and severity of seasonal and pandemic influenza: results of the Flu Watch cohort study. *Lancet Respir Med* 2014;**2**:445–54. doi:10.1016/S2213-2600(14)70034-7
- 5 Tam CC, Rodrigues LC, Viviani L, *et al.* Longitudinal study of infectious intestinal disease in the UK (IID2 study): incidence in the community and presenting to general practice. *Gut* 2012;**61**:69–77. doi:10.1136/gut.2011.238386
- 6 NHS Digital. Health Survey for England - Health, social care and lifestyles - NHS Digital. <https://digital.nhs.uk/data-and-information/areas-of-interest/public-health/health-survey-for-england-health-social-care-and-lifestyles> (accessed 20 Nov 2018).
- 7 NatCen Social Research and UCL. Health Survey for England 2016 Methods. 2017. <https://files.digital.nhs.uk/publication/m/3/hse2016-methods-text.pdf> (accessed 20 Nov 2018).
- 8 Harris PA, Taylor R, Thielke R, *et al.* Research electronic data capture (REDCap)—A metadata-driven methodology and workflow process for providing translational research informatics support. *J Biomed Inform* 2009;**42**:377–81. doi:10.1016/J.JBI.2008.08.010
- 9 Ipsos Mori. Wellcome Trust Monitor Report Wave 3. London: 2016. doi:10.6084/m9.figshare.3145744
- 10 EuroQol Group. EuroQol—a new facility for the measurement of health-related quality of life. *Health Policy* 1990;**16**:199–208. <http://www.ncbi.nlm.nih.gov/pubmed/10109801> (accessed 20 Nov 2018).
- 11 Michie S, van Stralen MM, West R. The behaviour change wheel: a new method for characterising and designing behaviour change interventions. *Implement Sci* 2011;**6**:42. doi:10.1186/1748-5908-6-42

### Authors' contributions

Written on behalf of the Preserving Antibiotics through Safe Stewardship (PASS) study research group. CMS is responsible for data collection, management and analysis, and drafted the protocol. ACH, EBF, and the PASS study investigators developed the concept for the study. All authors contributed to the study design and development of the questionnaires. AC, FM and SH led recruitment. All authors have checked and approved the protocol to be published.

### Funding statement

This work is supported by the Economic and Social Research Council, grant number ES/P008321/1, as part of the Preserving Antibiotics through Safe Stewardship (PASS) project. MJR is funded by an NIHR Post-Doctoral Research Fellowship (PDF-2014-07-013). The views expressed in this publication are those of the authors and not necessarily those of the NHS, the National Institute for Health Research or the Department of Health and Social Care.

### Competing interests

None declared.

**Word count** 2110



**Table 1:** Baseline data collection

| Section               | Fields included                                                                                                                                                                                                                                                                                                                                                                                                                                                                                                          |
|-----------------------|--------------------------------------------------------------------------------------------------------------------------------------------------------------------------------------------------------------------------------------------------------------------------------------------------------------------------------------------------------------------------------------------------------------------------------------------------------------------------------------------------------------------------|
| Consent               | <ul style="list-style-type: none"> <li>• Consent to participate in Bug Watch (required)</li> <li>• Permission to be contacted for qualitative interviews; for data to be linked to the Health Survey for England; to be contacted about a urinary tract infection sub-study (optional)</li> </ul>                                                                                                                                                                                                                        |
| Contact details       | <ul style="list-style-type: none"> <li>• ID number (from invitation letter)</li> <li>• Name</li> <li>• Email address</li> <li>• Postal address</li> </ul>                                                                                                                                                                                                                                                                                                                                                                |
| Demographics          | <ul style="list-style-type: none"> <li>• Date of birth</li> <li>• Sex</li> <li>• Country of birth</li> <li>• Ethnic group</li> <li>• Work status (employed, in education, unemployed, retired, etc.)</li> <li>• Full or part time work</li> <li>• Is a healthcare worker</li> </ul>                                                                                                                                                                                                                                      |
| General health        | <ul style="list-style-type: none"> <li>• Long term illnesses or health problems</li> <li>• Recurrent urinary tract infections</li> <li>• Currently pregnant; which trimester</li> <li>• Smoking status</li> <li>• Seasonal influenza vaccine in the last year</li> <li>• EQ-5D-3L</li> </ul>                                                                                                                                                                                                                             |
| GP consultations      | <ul style="list-style-type: none"> <li>• Number of GP consultations in last 12 months</li> </ul>                                                                                                                                                                                                                                                                                                                                                                                                                         |
| Antibiotics           | <ul style="list-style-type: none"> <li>• Ever been prescribed antibiotics; number in last 12 months</li> <li>• Ever been prescribed antibiotics but thought it was not the right treatment</li> <li>• When last took antibiotics; were they prescribed (if not, where from); were all taken</li> <li>• Ever asked for an antibiotic prescription; was it given; needed to persuade</li> <li>• Which conditions think can be treated with antibiotics</li> <li>• Understanding of term "antibiotic resistance"</li> </ul> |
| Oral health           | <ul style="list-style-type: none"> <li>• Rate dental health (global item)</li> <li>• Has dentures</li> <li>• Dental symptoms in last 12 months</li> <li>• Problems caused by mouth/ teeth/ dentures in last 12 months (impact on quality of life)</li> </ul>                                                                                                                                                                                                                                                             |
| Household composition | <ul style="list-style-type: none"> <li>• Number of adults (aged 16+)</li> <li>• Number of children, number to be registered (up to 4)</li> </ul>                                                                                                                                                                                                                                                                                                                                                                         |

NB: Questions are filtered and adapted based on previous responses so that they are only shown to participants when relevant. For example, "Currently pregnant" is not shown if sex is given as male.

**Table 2** Symptoms of infection to be collected in Bug Watch

| Respiratory            | Gastrointestinal        | Eye            | Urinary tract              | Skin/ soft tissue   | Mouth/ dental | General/ non-specific |
|------------------------|-------------------------|----------------|----------------------------|---------------------|---------------|-----------------------|
| Runny nose             | Nausea                  | Red eye        | Painful urination          | Rash (general)      | Toothache     | Fever                 |
| Blocked nose           | Vomiting                | Conjunctivitis | Frequent urination         | Rash (local)        | Mouth ulcer   | Chills                |
| Sneezing               | Stomach/ abdominal pain | Stye           | Urgent urination           | Itchy (general)     | Gum abscess   | Muscle aches          |
| Dry cough              | Diarrhoea               |                |                            | Itchy (local)       |               | Night sweats          |
| Coughing up phlegm     |                         |                | Cloudy/ dark/ smelly urine | Boils/ abscesses    |               | Fatigue               |
| Short of breath        |                         |                | Blood in urine             | Infected wound/ cut |               | Headache              |
| Ear ache/ pain         |                         |                | Bladder pain               | Mastitis            |               | Migraine              |
| Fluid leaking from ear |                         |                | Kidney pain                | Chicken pox         |               | Loss of appetite      |
| Sinus pain/ congestion |                         |                |                            | Shingles            |               |                       |

**Table 3:** Example items exploring barriers/enablers to GP consulting and antibiotic seeking behaviours, based on the COM-B model of behaviour change [11] (asked at the end of a series of symptoms in Bug Watch)

| COM-B Domain               | Example barrier/enabler belief statements                                                                                                                                                            |
|----------------------------|------------------------------------------------------------------------------------------------------------------------------------------------------------------------------------------------------|
| Capability (psychological) | <p>'I thought antibiotics would be effective in treating my symptoms'</p> <p>'I did not know what other treatments were available'</p>                                                               |
| Capability (physical)      | <p>'I felt too unwell to travel to the GP practice'</p>                                                                                                                                              |
| Opportunity (social)       | <p>'I was encouraged by others to go see my GP'</p> <p>'My GP discussed alternatives ways of managing my symptoms'</p> <p>'I was involved in the decision of whether or not to take antibiotics'</p> |
| Opportunity (physical)     | <p>'I was unable to take time off work to recover without taking antibiotics'</p> <p>'Other treatments were too expensive'</p> <p>'It was easy to get a GP appointment'</p>                          |
| Motivation (reflective)    | <p>'I felt confident in safely treating my symptoms without antibiotics'</p> <p>'I did not think I would get better as quickly without antibiotics'</p>                                              |
| Motivation (automatic)     | <p>'I was worried about my symptoms'</p> <p>'I always go see my GP when I have these types of symptoms'</p> <p>'I felt reassured that I could safely manage my symptoms without antibiotics'</p>     |

STROBE Statement—Checklist of items that should be included in reports of *cohort studies*

|                              | Item No | Recommendation                                                                                                                                                                                                                                                                                                         |
|------------------------------|---------|------------------------------------------------------------------------------------------------------------------------------------------------------------------------------------------------------------------------------------------------------------------------------------------------------------------------|
| <b>Title and abstract</b>    | 1       | (a) Indicate the study's design with a commonly used term in the title or the abstract <b>p1</b><br>(b) Provide in the abstract an informative and balanced summary of what was done and what was found <b>p2</b>                                                                                                      |
| <b>Introduction</b>          |         |                                                                                                                                                                                                                                                                                                                        |
| Background/rationale         | 2       | Explain the scientific background and rationale for the investigation being reported <b>p3</b>                                                                                                                                                                                                                         |
| Objectives                   | 3       | State specific objectives, including any prespecified hypotheses <b>p3</b>                                                                                                                                                                                                                                             |
| <b>Methods</b>               |         |                                                                                                                                                                                                                                                                                                                        |
| Study design                 | 4       | Present key elements of study design early in the paper <b>p3</b>                                                                                                                                                                                                                                                      |
| Setting                      | 5       | Describe the setting, locations, and relevant dates, including periods of recruitment, exposure, follow-up, and data collection <b>p3,4,5</b>                                                                                                                                                                          |
| Participants                 | 6       | (a) Give the eligibility criteria, and the sources and methods of selection of participants. Describe methods of follow-up <b>p3,4,5</b><br>(b) For matched studies, give matching criteria and number of exposed and unexposed <b>NA</b>                                                                              |
| Variables                    | 7       | Clearly define all outcomes, exposures, predictors, potential confounders, and effect modifiers. Give diagnostic criteria, if applicable <b>p4,5, Table 1, Table 2</b>                                                                                                                                                 |
| Data sources/<br>measurement | 8*      | For each variable of interest, give sources of data and details of methods of assessment (measurement). Describe comparability of assessment methods if there is more than one group <b>p4,5, Table 1, Table 2</b>                                                                                                     |
| Bias                         | 9       | Describe any efforts to address potential sources of bias <b>p5,6</b>                                                                                                                                                                                                                                                  |
| Study size                   | 10      | Explain how the study size was arrived at <b>p3</b>                                                                                                                                                                                                                                                                    |
| Quantitative variables       | 11      | Explain how quantitative variables were handled in the analyses. If applicable, describe which groupings were chosen and why <b>p5</b>                                                                                                                                                                                 |
| Statistical methods          | 12      | (a) Describe all statistical methods, including those used to control for confounding<br>(b) Describe any methods used to examine subgroups and interactions<br>(c) Explain how missing data were addressed<br>(d) If applicable, explain how loss to follow-up was addressed<br>(e) Describe any sensitivity analyses |
| <b>Results - NA</b>          |         |                                                                                                                                                                                                                                                                                                                        |
| Participants                 | 13*     | (a) Report numbers of individuals at each stage of study—eg numbers potentially eligible, examined for eligibility, confirmed eligible, included in the study, completing follow-up, and analysed<br>(b) Give reasons for non-participation at each stage<br>(c) Consider use of a flow diagram                        |
| Descriptive data             | 14*     | (a) Give characteristics of study participants (eg demographic, clinical, social) and information on exposures and potential confounders<br>(b) Indicate number of participants with missing data for each variable of interest<br>(c) Summarise follow-up time (eg, average and total amount)                         |
| Outcome data                 | 15*     | Report numbers of outcome events or summary measures over time                                                                                                                                                                                                                                                         |
| Main results                 | 16      | (a) Give unadjusted estimates and, if applicable, confounder-adjusted estimates and their precision (eg, 95% confidence interval). Make clear which confounders were adjusted for and why they were included                                                                                                           |

|    |                          |                                                                                         |
|----|--------------------------|-----------------------------------------------------------------------------------------|
| 1  |                          | (b) Report category boundaries when continuous variables were categorized               |
| 2  |                          | (c) If relevant, consider translating estimates of relative risk into absolute risk for |
| 3  |                          | a meaningful time period                                                                |
| 4  |                          |                                                                                         |
| 5  | Other analyses           | 17 Report other analyses done—eg analyses of subgroups and interactions, and            |
| 6  |                          | sensitivity analyses                                                                    |
| 7  |                          |                                                                                         |
| 8  | <b>Discussion - NA</b>   |                                                                                         |
| 9  | Key results              | 18 Summarise key results with reference to study objectives                             |
| 10 | Limitations              | 19 Discuss limitations of the study, taking into account sources of potential bias or   |
| 11 |                          | imprecision. Discuss both direction and magnitude of any potential bias                 |
| 12 |                          |                                                                                         |
| 13 | Interpretation           | 20 Give a cautious overall interpretation of results considering objectives,            |
| 14 |                          | limitations, multiplicity of analyses, results from similar studies, and other          |
| 15 |                          | relevant evidence                                                                       |
| 16 |                          |                                                                                         |
| 17 | Generalisability         | 21 Discuss the generalisability (external validity) of the study results                |
| 18 |                          |                                                                                         |
| 19 | <b>Other information</b> |                                                                                         |
| 20 | Funding                  | 22 Give the source of funding and the role of the funders for the present study and, if |
| 21 |                          | applicable, for the original study on which the present article is based p8             |
| 22 |                          |                                                                                         |

\*Give information separately for exposed and unexposed groups.

**Note:** An Explanation and Elaboration article discusses each checklist item and gives methodological background and published examples of transparent reporting. The STROBE checklist is best used in conjunction with this article (freely available on the Web sites of PLoS Medicine at <http://www.plosmedicine.org/>, Annals of Internal Medicine at <http://www.annals.org/>, and Epidemiology at <http://www.epidem.com/>). Information on the STROBE Initiative is available at <http://www.strobe-statement.org>.

# BMJ Open

## Symptom reporting, healthcare-seeking behaviour and antibiotic use for common infections: protocol for Bug Watch, a prospective community cohort study

|                                 |                                                                                                                                                                                                                                                                                                                                                                                                                                                                                                                                                                                                                                                                                                                                                                                                                                                                                                                                                       |
|---------------------------------|-------------------------------------------------------------------------------------------------------------------------------------------------------------------------------------------------------------------------------------------------------------------------------------------------------------------------------------------------------------------------------------------------------------------------------------------------------------------------------------------------------------------------------------------------------------------------------------------------------------------------------------------------------------------------------------------------------------------------------------------------------------------------------------------------------------------------------------------------------------------------------------------------------------------------------------------------------|
| Journal:                        | <i>BMJ Open</i>                                                                                                                                                                                                                                                                                                                                                                                                                                                                                                                                                                                                                                                                                                                                                                                                                                                                                                                                       |
| Manuscript ID                   | bmjopen-2018-028676.R2                                                                                                                                                                                                                                                                                                                                                                                                                                                                                                                                                                                                                                                                                                                                                                                                                                                                                                                                |
| Article Type:                   | Protocol                                                                                                                                                                                                                                                                                                                                                                                                                                                                                                                                                                                                                                                                                                                                                                                                                                                                                                                                              |
| Date Submitted by the Author:   | 19-Mar-2019                                                                                                                                                                                                                                                                                                                                                                                                                                                                                                                                                                                                                                                                                                                                                                                                                                                                                                                                           |
| Complete List of Authors:       | Smith, Catherine; University College London, Institute of Health Informatics<br>Conolly, Anne; NatCen Social Research<br>Fuller, Christopher; University College London, Institute of Health Informatics<br>Hill, Suzanne; NatCen Social Research<br>Lorenatto, F; University College London, Centre for Behaviour Change<br>Marcheselli, Franziska; NatCen Social Research<br>Michie, Susan; University College London, Centre for Behaviour Change<br>Mindell, Jennifer; University College London, Epidemiology & Public Health<br>Ridd, Matthew; University of Bristol, Population Health Science Institute<br>Shallcross, Laura; University College London, Institute of Health Informatics<br>Tsakos, Georgios; University College London, Institute of Epidemiology and Health Care<br>Hayward, Andrew; University College London, Epidemiology and Health Care<br>Fragaszy, Ellen; University College London, Institute of Health Informatics |
| <b>Primary Subject Heading</b>: | Epidemiology                                                                                                                                                                                                                                                                                                                                                                                                                                                                                                                                                                                                                                                                                                                                                                                                                                                                                                                                          |
| Secondary Subject Heading:      | Infectious diseases, Public health                                                                                                                                                                                                                                                                                                                                                                                                                                                                                                                                                                                                                                                                                                                                                                                                                                                                                                                    |
| Keywords:                       | Epidemiology < INFECTIOUS DISEASES, INFECTIOUS DISEASES, Public health < INFECTIOUS DISEASES, PRIMARY CARE                                                                                                                                                                                                                                                                                                                                                                                                                                                                                                                                                                                                                                                                                                                                                                                                                                            |
|                                 |                                                                                                                                                                                                                                                                                                                                                                                                                                                                                                                                                                                                                                                                                                                                                                                                                                                                                                                                                       |

SCHOLARONE™  
Manuscripts

1  
2  
3 **Symptom reporting, healthcare-seeking behaviour and antibiotic use for common infections:**  
4 **protocol for Bug Watch, a prospective community cohort study**  
5  
6  
7

8 **Authors and affiliations**  
9

10 *On behalf of the Preserving Antibiotics through Safe Stewardship (PASS) study research group:*  
11

12 Catherine M Smith<sup>1</sup>, Anne Conolly<sup>2</sup>, Christopher Fuller<sup>1</sup>, Suzanne Hill<sup>2</sup>, Fabiana Lorencatto<sup>3</sup>, Franziska  
13 Marcheselli<sup>2</sup>, Susan Michie<sup>3</sup>, Jennifer S Mindell<sup>4</sup>, Matthew J Ridd<sup>5</sup>, Laura Shallcross<sup>1</sup>, Georgios Tsakos<sup>6</sup>,  
14 Andrew C Hayward<sup>6</sup>, Ellen B Fragaszy<sup>1</sup>  
15

- 16  
17  
18 1. University College London Institute of Health Informatics  
19  
20 2. NatCen Social Research  
21  
22 3. University College London Centre for Behaviour Change  
23  
24 4. University College London Department of Epidemiology & Public Health  
25  
26 5. Population Health Science Institute, University of Bristol  
27  
28 6. University College London Institute of Epidemiology and Health Care  
29  
30

31 **Corresponding author**  
32

33 Catherine Smith, UCL Institute of Health Informatics, 222 Euston Road, London, NW1 2DA  
34 catherine.m.smith@ucl.ac.uk  
35  
36  
37  
38  
39  
40  
41  
42  
43  
44  
45  
46  
47  
48  
49  
50  
51  
52  
53  
54  
55  
56  
57  
58  
59  
60

## Abstract

### *Introduction*

Antimicrobial resistance is a significant worldwide problem largely driven by selective pressure exerted through antibiotic use. Preserving antibiotics requires identification of opportunities to safely reduce prescriptions, for example in the management of mild common infections in the community. However, more information is needed on how infections are usually managed and what proportion lead to consultation and antibiotic use. The aim of this study is to quantify consultation and prescribing patterns in the community for a range of common acute infection syndromes (respiratory, gastrointestinal, skin/soft tissue, mouth/dental, eye and urinary tract). This will inform development of interventions to improve antibiotic stewardship as part of a larger programme of work, Preserving Antibiotics through Safe Stewardship (PASS).

### *Methods and analysis*

This will be an online prospective community cohort study in England. We will invite 19,510 adults who previously took part in a nationally-representative survey (the Health Survey for England) and consented to be contacted about future studies. Adults will also be asked to register their children. Data collection will consist of a baseline registration survey followed by weekly surveys sent by email for six months. Weekly surveys will collect information on symptoms of common infections, healthcare-seeking behaviour, and use of treatments including antibiotics. We will calculate the proportions of infection syndromes that lead to GP consultation and antibiotic prescription. We will investigate how healthcare-seeking and treatment behaviours vary by demographics, social deprivation, infection profiles, and knowledge and attitudes towards antibiotics, and will apply behavioural theory to investigate barriers and enablers to these behaviours.

### *Ethics and dissemination*

This study has been given ethical approval by the UCL Research Ethics Committee (ID 11813/001). Each participant will provide informed consent upon registration. We will disseminate our work through publication in peer-reviewed academic journals. Anonymised data will be made available through the UK Data Service (<https://www.ukdataservice.ac.uk/>).

### **Strengths and limitations of this study**

- This study will use a novel and efficient method for large-scale collection of information about symptoms and related healthcare-seeking behaviours.
- It will address an important aspect of primary care (antibiotic use) by collecting data on a comprehensive set of symptoms of common infections, but will not cover sexually-transmitted infections.
- Collecting data over an entire year will allow seasonal variations to be explored.
- Participants will be recruited from a sample that is representative of the population living in private households in England.
- The prospective community cohort design will enable information to be captured about symptoms irrespective of medical consultation.



## Introduction

The emergence of antimicrobial resistance (AMR) is a significant worldwide problem. It is largely driven by selective pressure exerted through antibiotic use and has led to some infections becoming untreatable with existing antimicrobials.[1] Preserving antibiotics for the future depends on achieving a safe balance between potential population harms of prescribing antibiotics and risks to the individual of not prescribing. The set of actions that promote this responsible use of antibiotics is referred to as antibiotic stewardship.[2]

Improving stewardship requires identification of opportunities to safely reduce prescriptions of antibiotics. Although overprescribing of antibiotics for patients presenting at primary care with common infections has been widely reported,[3] there is also evidence for a significant clinical “iceberg” of infection.[4,5] For example, previous studies have shown that most patients safely manage respiratory and gastrointestinal symptoms without consulting their GP or taking an antibiotic.[4,5] This suggests that inappropriate antibiotic prescriptions could be reduced through improved management of common infections and associated symptoms in the community. There is limited information, however, on how the public manage symptoms of other infections, what proportion of infections lead to consultation and antibiotic use, or how these rates vary according to type of symptoms or patient characteristics. Establishing this requires information to be captured on patients in the community, including those who do not seek healthcare, and identification of healthcare-seeking behaviours, ideally through prospective follow-up.

The aim of the Bug Watch study is to quantify consultation and antibiotic prescribing patterns in the community for a range of acute common infections (respiratory, gastrointestinal, skin/soft tissue, mouth/dental, eye and urinary tract). Bug Watch is part of a larger programme of work, Preserving Antibiotics through Safe Stewardship (PASS), which aims to inform the development of multifaceted behavioural interventions that will strengthen antibiotic stewardship across a range of healthcare settings. Results from Bug Watch will be synthesised with insights from qualitative interviews to identify opportunities for improved antibiotic stewardship in the community and general practice and inform development of interventions.

## Methods and analysis

### *Study design and setting*

This will be an online prospective community cohort study in England. Data collection will consist of a baseline registration survey followed by weekly surveys for six months. Weekly surveys will collect information on symptoms of common infections, healthcare-seeking behaviour, and use of treatments including antibiotics.

### *Recruitment*

We will recruit participants through the Health Survey for England (HSE). HSE is an annual survey first conducted in 1991 that monitors changes in the health and lifestyles of people living in England.[6] It is commissioned by NHS Digital and run by NatCen Social Research and the UCL Research Department of Epidemiology and Public Health. The sample of individuals included in HSE each year is designed to be representative of the population living in private households in England. Full details of the methods for HSE sample have been described previously.[7]

1  
2  
3 We will invite all adults who took part in the HSE in 2013, 2014 or 2015 and who consented to be  
4 contacted about future research studies (with the exception of 50-53 year olds from the 2015 survey  
5 who were recruited to a different study). This comprises 19,510 adults, of whom we estimate 15,819  
6 (81%) will still be resident at the address on record when they are contacted. Parents or guardians will  
7 be invited to register up to four children aged under sixteen, and all information for children will be  
8 reported by the adult who registered them. Anyone aged sixteen or over living in the same household  
9 will be invited to register separately.  
10  
11

12 As this is a largely descriptive study, and the primary outcome is calculation of rates, we did not require  
13 a formal power calculation. Based on their experience of previous population surveys, NatCen estimated  
14 that approximately 25% of those who received a letter would sign up (~4,000), and approximately 50%  
15 of those who signed up would complete follow-up (~2,000 people completing six months of follow-up).  
16 This would equate to approximately 1,000 person-years of follow-up, which would allow calculation of  
17 crude rates of 500 cases per 1,000 person-years with a 95% CI of 457-546; 200 cases per 1,000 person-  
18 years, 95% CI 173-230; and 100 cases per 1,000 person-years 95% CI 81-122.  
19  
20

21 Recruitment will be conducted in four waves starting in March, June, September and November 2018.  
22 Initial invitations to take part in Bug Watch will be sent by post. Those who wish to sign up will be  
23 directed to a web link. A second reminder letter will be sent to those who have not registered  
24 approximately three weeks after the initial invitation was sent. Where possible, invitation reminders will  
25 also be sent by email or SMS text message. Individuals who are invited and do not wish to take part in  
26 the study will be removed from contact lists.  
27  
28

### 29 *Participant materials and incentives*

30

31 The initial invitation letter will include a participant information sheet which will describe the purpose of  
32 the study, what participants will be asked to do, and the contact details of the study team. It will also  
33 include a paper copy of a "symptom diary", which will be designed to help participants to keep track of  
34 the symptoms of infection that will be collected in the weekly surveys.  
35  
36

37 Study invitations will direct those interested in participating to a UCL web page. This page will include  
38 the registration survey URL as well as a short video describing the study. Those wishing to register  
39 children will also be able to download an information sheet for children. We will design this sheet so  
40 that it is suitable to be read by anyone aged approximately eight years or older. Following registration,  
41 participants will be sent a reusable laminated copy of the symptom diary, a pen, and a Bug Watch-  
42 branded magnet.  
43

44 During follow-up, participants will be sent two email newsletters. These newsletters will provide  
45 updates about the study such as rates of weekly survey completion. To avoid influencing the behaviour  
46 of participants during follow-up, the newsletters will not include details about the main study outcomes.  
47  
48

49 All participants will receive a £5 voucher to thank them for registering. At the end of follow-up, those  
50 who have completed at least 50% of their weekly surveys will be sent an additional £5 voucher to thank  
51 them for participating. They will also be entered into a prize draw to win a further £50 voucher.  
52

### 53 *Data collection*

54  
55  
56  
57  
58  
59  
60

1  
2  
3 All data will be collected using REDCap electronic data capture tools hosted on the UCL Data Safe  
4 Haven.[8] REDCap (Research Electronic Data Capture) is a secure, web-based application for research  
5 studies. The UCL Data Safe Haven provides a technical solution for storing, handling and analysing  
6 identifiable data. It has been certified to the ISO27001 information security standard and conforms to  
7 NHS Digital's Information Governance Toolkit. Data analysis will also be conducted within the UCL Data  
8 Safe Haven, from which personal information will not be removed.  
9

10  
11 Online registration will take approximately 15 minutes per person. Participants will be asked to provide  
12 consent, confirming that they have read and understood the information sheets. Parents or legal  
13 guardians will be asked to give formal consent for children under the age of 16. For children that are  
14 able to give assent, the parent or legal guardian will be asked to discuss with them whether they wish to  
15 take part or not. Consent for linking data to the broader HSE survey data and for contact for qualitative  
16 interviews will also be requested.  
17

18  
19 Full details of the baseline data collection are shown in Table 1. The baseline survey will collect  
20 information on contact details, demographics, household composition, general health, oral health and  
21 GP consultations. It will also include questions about knowledge and attitudes towards antibiotics,  
22 adapted from Wave 3 of the Wellcome Trust Monitor survey, and the EQ-5D-3L instrument for  
23 measuring health-related quality of life.[9][10] The Wellcome Trust Monitor survey is designed to be  
24 representative of the UK adult population and measures trends in public attitudes towards science.  
25 Wave 3 of the survey, conducted in 2015, included a set of questions about knowledge and attitudes  
26 towards antibiotics. The EQ-5D-3L is a standardised measure of health status developed by the EuroQol  
27 Group that provides a simple, generic measure of health for clinical and economic appraisal.[10]  
28

29  
30 On the first Monday after registration, participants will be sent an email reminding them to start  
31 keeping track of symptoms of infection. Following this, they will be sent weekly emails each Monday  
32 with a link to a survey to fill in details about symptoms from the previous seven days and how they  
33 managed them. These emails will be sent each week for six months, and each survey will be open for  
34 one week. One reminder email will be sent on the Thursday of each week if the survey has not been  
35 completed. Participants will be given the opportunity to complete feedback forms about Bug Watch  
36 after approximately six weeks of participation, and again after all weekly surveys have been sent.  
37

38  
39 The symptoms that will be monitored in Bug Watch are shown in Table 2. For each day that a symptom  
40 is reported, participants will be asked to rate its severity (mild, moderate or severe) and to complete the  
41 EQ-5D-3L. They will also be asked to report what they did about their symptoms including whether they  
42 took time off work (or school), sought medical advice, or took any treatments. When antibiotics are  
43 reported, further details will be collected about the type of antibiotic, duration, who it was prescribed  
44 by (or how otherwise obtained) and adherence to treatment.  
45

46  
47 At the end of a series of symptoms, participants will be asked to complete a set of questions about what  
48 influenced how they managed their symptoms, specifically whether or not they consulted their GP and  
49 sought antibiotics. We will apply the COM-B (Capability, Motivation, Opportunity, Behaviour) model of  
50 behaviour change, which has been validated for studies of the general population, [11] to explore the  
51 wide-range of potential individual, socio-cultural and environmental barriers/enablers to these  
52 behaviours. The survey will include at least one item mapping onto each domain of the COM-B model  
53 (Table 3). Items will be in the form of belief statements to which participants rate their agreement on  
54 Likert-type scales from 1- Strongly Disagree to 5 - Strongly Agree.  
55  
56  
57

1  
2  
3 In all surveys, we will make use of “skip logic” to ensure that participants are only shown questions that  
4 are relevant to them. For example, they will first be asked if they have any symptoms, and only if they  
5 do will they be shown specific symptom categories. Weekly surveys will therefore take no longer than a  
6 minute if no symptoms are reported, and approximately 5-10 minutes if symptoms are reported.  
7

### 8 *Statistical analysis*

9  
10 We will describe the demographic characteristics of the Bug Watch cohort and assess its  
11 representativeness by comparing with the characteristics of the broader HSE sample and published  
12 national statistics. We will also assess the representativeness of the knowledge and attitudes towards  
13 antibiotics of the cohort by comparing with the Wellcome Trust Monitor Survey.[9]  
14  
15

16 Symptoms reported will be combined into infection syndromes (i.e., combinations of symptoms  
17 associated with an episode of infection). We will create descriptive profiles of infection syndromes  
18 including types of symptom reported, duration, timing and severity. We will calculate the proportions of  
19 infection syndromes that lead to people consulting their GP and receiving antibiotics. Antibiotic use will  
20 be described in terms of type of antibiotic, duration, who it was prescribed by (or how otherwise  
21 obtained) and adherence to treatment. Other healthcare-seeking behaviours, behavioural influences  
22 (barriers and enablers within the COM-B model), and treatments taken to manage symptoms will also  
23 be described.  
24  
25

26 We will use Poisson regression to calculate rates of infection, consultation and antibiotic prescribing.  
27 These analyses will be weighted by the population structure of England (age, sex, index of multiple  
28 deprivation, region – as indicted by representativeness) and will account for the clustered nature of the  
29 data. We will use logistic regression to investigate how GP consultation and antibiotic prescribing varies  
30 by age, gender, ethnicity, presence of other illnesses, social deprivation, infection syndrome, and  
31 knowledge and attitudes towards antibiotics. Continuous variables will be converted into categorical  
32 variables. We will also assess the impact of different types of infection on quality of life using the EQ5D-  
33 3L scores, and on reported work and school absences. We will use these measures to estimate the  
34 overall impact of community infection at the population level. Full statistical methods will be presented  
35 with relevant analyses.  
36  
37  
38

### 39 *Patient and public involvement*

40  
41 Participants were not directly involved in design of this study although feedback will be collected at two  
42 time points during follow up. Newsletters will be sent to give participants updates during the study, and  
43 a summary of the main findings will be available at the end. As part of the wider PASS study, a subset of  
44 participants will be invited to take part in qualitative interviews that will draw on behavioural theory to  
45 investigate the drivers of healthcare-seeking behaviours (full methods will be published elsewhere).  
46 Findings from Bug Watch and the related interviews will inform stakeholder panels to develop  
47 stewardship interventions through a user-centred design approach.  
48  
49

### 50 **Ethics and dissemination**

51  
52 This study has been given ethical approval by the UCL Research Ethics Committee (ID 11813/001). Each  
53 participant will provide informed consent upon registration. We will disseminate our work through  
54 publication in peer-reviewed academic journals and presentation at conferences. Findings will  
55 contribute to interventions and educational materials developed through the wider PASS study.  
56  
57  
58  
59  
60

1  
2  
3  
4  
5  
6  
7  
8  
9  
10  
11  
12  
13  
14  
15  
16  
17  
18  
19  
20  
21  
22  
23  
24  
25  
26  
27  
28  
29  
30  
31  
32  
33  
34  
35  
36  
37  
38  
39  
40  
41  
42  
43  
44  
45  
46  
47  
48  
49  
50  
51  
52  
53  
54  
55  
56  
57  
58  
59  
60

Anonymised data from Bug Watch will be made available through the UK Data Service (<https://www.ukdataservice.ac.uk/>) for use by other researchers.

For peer review only

## References

- 1 World Health Organization, Food and Agriculture Organization of the United Nations, Health WO for A. Monitoring global progress on addressing antimicrobial resistance: analysis report of the second round of results of AMR country self-assessment survey 2018. 2018. <http://apps.who.int/iris/bitstream/handle/10665/273128/9789241514422-eng.pdf?ua=1> (accessed 18 Dec 2018).
- 2 Dyar OJ, Huttner B, Schouten J, *et al.* What is antimicrobial stewardship? *Clin Microbiol Infect* 2017;**23**:793. doi:10.1016/j.cmi.2017.08.026
- 3 Pouwels KB, Dolk FCK, Smith DRM, *et al.* Actual versus 'ideal' antibiotic prescribing for common conditions in English primary care. *J Antimicrob Chemother* 2018;**73**:19–26. doi:10.1093/jac/dkx502
- 4 Hayward AC, Fragaszy EB, Bermingham A, *et al.* Comparative community burden and severity of seasonal and pandemic influenza: results of the Flu Watch cohort study. *Lancet Respir Med* 2014;**2**:445–54. doi:10.1016/S2213-2600(14)70034-7
- 5 Tam CC, Rodrigues LC, Viviani L, *et al.* Longitudinal study of infectious intestinal disease in the UK (IID2 study): incidence in the community and presenting to general practice. *Gut* 2012;**61**:69–77. doi:10.1136/gut.2011.238386
- 6 NHS Digital. Health Survey for England - Health, social care and lifestyles - NHS Digital. <https://digital.nhs.uk/data-and-information/areas-of-interest/public-health/health-survey-for-england-health-social-care-and-lifestyles> (accessed 20 Nov 2018).
- 7 NatCen Social Research and UCL. Health Survey for England 2016 Methods. 2017. <https://files.digital.nhs.uk/publication/m/3/hse2016-methods-text.pdf> (accessed 20 Nov 2018).
- 8 Harris PA, Taylor R, Thielke R, *et al.* Research electronic data capture (REDCap)—A metadata-driven methodology and workflow process for providing translational research informatics support. *J Biomed Inform* 2009;**42**:377–81. doi:10.1016/J.JBI.2008.08.010
- 9 Ipsos Mori. Wellcome Trust Monitor Report Wave 3. London: 2016. doi:10.6084/m9.figshare.3145744
- 10 EuroQol Group. EuroQol—a new facility for the measurement of health-related quality of life. *Health Policy* 1990;**16**:199–208. <http://www.ncbi.nlm.nih.gov/pubmed/10109801> (accessed 20 Nov 2018).
- 11 Michie S, van Stralen MM, West R. The behaviour change wheel: a new method for characterising and designing behaviour change interventions. *Implement Sci* 2011;**6**:42. doi:10.1186/1748-5908-6-42

**Authors' contributions**

Written on behalf of the Preserving Antibiotics through Safe Stewardship (PASS) study research group. CMS is responsible for data collection, management and analysis, and drafted the protocol. ACH, EBF, and the PASS study investigators developed the concept for the study. All authors (CMS, AC, CF, SH, FL, FM, SM, JSM, MJR, LS, GT, ACH, EBF) contributed to the study design and development of the questionnaires. AC, FM and SH led recruitment. All authors (CMS, AC, CF, SH, FL, FM, SM, JSM, MJR, LS, GT, ACH, EBF) have checked and approved the protocol to be published.

**Funding statement**

This work is supported by the Economic and Social Research Council, grant number ES/P008321/1, as part of the Preserving Antibiotics through Safe Stewardship (PASS) project. Professor Hayward is a National Institute for Health Research (NIHR) Senior Investigator. MJR is funded by an NIHR Post-Doctoral Research Fellowship (PDF-2014-07-013). The views expressed in this publication are those of the authors and not necessarily those of the NHS, the National Institute for Health Research or the Department of Health and Social Care.

**Competing interests**

None declared.

**Word count** 2241

**Table 1:** Baseline data collection

| Section               | Fields included                                                                                                                                                                                                                                                                                                                                                                                                                                                                                                          |
|-----------------------|--------------------------------------------------------------------------------------------------------------------------------------------------------------------------------------------------------------------------------------------------------------------------------------------------------------------------------------------------------------------------------------------------------------------------------------------------------------------------------------------------------------------------|
| Consent               | <ul style="list-style-type: none"> <li>• Consent to participate in Bug Watch (required)</li> <li>• Permission to be contacted for qualitative interviews; for data to be linked to the Health Survey for England; to be contacted about a urinary tract infection sub-study (optional)</li> </ul>                                                                                                                                                                                                                        |
| Contact details       | <ul style="list-style-type: none"> <li>• ID number (from invitation letter)</li> <li>• Name</li> <li>• Email address</li> <li>• Postal address</li> </ul>                                                                                                                                                                                                                                                                                                                                                                |
| Demographics          | <ul style="list-style-type: none"> <li>• Date of birth</li> <li>• Sex</li> <li>• Country of birth</li> <li>• Ethnic group</li> <li>• Work status (employed, in education, unemployed, retired, etc.)</li> <li>• Full or part time work</li> <li>• Is a healthcare worker</li> </ul>                                                                                                                                                                                                                                      |
| General health        | <ul style="list-style-type: none"> <li>• Long term illnesses or health problems</li> <li>• Recurrent urinary tract infections</li> <li>• Currently pregnant; which trimester</li> <li>• Smoking status</li> <li>• Seasonal influenza vaccine in the last year</li> <li>• EQ-5D-3L</li> </ul>                                                                                                                                                                                                                             |
| GP consultations      | <ul style="list-style-type: none"> <li>• Number of GP consultations in last 12 months</li> </ul>                                                                                                                                                                                                                                                                                                                                                                                                                         |
| Antibiotics           | <ul style="list-style-type: none"> <li>• Ever been prescribed antibiotics; number in last 12 months</li> <li>• Ever been prescribed antibiotics but thought it was not the right treatment</li> <li>• When last took antibiotics; were they prescribed (if not, where from); were all taken</li> <li>• Ever asked for an antibiotic prescription; was it given; needed to persuade</li> <li>• Which conditions think can be treated with antibiotics</li> <li>• Understanding of term "antibiotic resistance"</li> </ul> |
| Oral health           | <ul style="list-style-type: none"> <li>• Rate dental health (global item)</li> <li>• Has dentures</li> <li>• Dental symptoms in last 12 months</li> <li>• Problems caused by mouth/ teeth/ dentures in last 12 months (impact on quality of life)</li> </ul>                                                                                                                                                                                                                                                             |
| Household composition | <ul style="list-style-type: none"> <li>• Number of adults (aged 16+)</li> <li>• Number of children, number to be registered (up to 4)</li> </ul>                                                                                                                                                                                                                                                                                                                                                                         |

NB: Questions are filtered and adapted based on previous responses so that they are only shown to participants when relevant. For example, "Currently pregnant" is not shown if sex is given as male.



**Table 2** Symptoms of infection to be collected in Bug Watch

| Respiratory            | Gastrointestinal        | Eye            | Urinary tract              | Skin/ soft tissue   | Mouth/ dental | General/ non-specific |
|------------------------|-------------------------|----------------|----------------------------|---------------------|---------------|-----------------------|
| Runny nose             | Nausea                  | Red eye        | Painful urination          | Rash (general)      | Toothache     | Fever                 |
| Blocked nose           | Vomiting                | Conjunctivitis | Frequent urination         | Rash (local)        | Mouth ulcer   | Chills                |
| Sneezing               | Stomach/ abdominal pain | Stye           | Urgent urination           | Itchy (general)     | Gum abscess   | Muscle aches          |
| Dry cough              | Diarrhoea               |                |                            | Itchy (local)       |               | Night sweats          |
| Coughing up phlegm     |                         |                | Cloudy/ dark/ smelly urine | Boils/ abscesses    |               | Fatigue               |
| Short of breath        |                         |                | Blood in urine             | Infected wound/ cut |               | Headache              |
| Ear ache/ pain         |                         |                | Bladder pain               | Mastitis            |               | Migraine              |
| Fluid leaking from ear |                         |                | Kidney pain                | Chicken pox         |               | Loss of appetite      |
| Sinus pain/ congestion |                         |                |                            | Shingles            |               |                       |

**Table 3:** Example items exploring barriers/enablers to GP consulting and antibiotic seeking behaviours, based on the COM-B model of behaviour change [11] (asked at the end of a series of symptoms in Bug Watch)

| COM-B Domain               | Example barrier/enabler belief statements                                                                                                                                                            |
|----------------------------|------------------------------------------------------------------------------------------------------------------------------------------------------------------------------------------------------|
| Capability (psychological) | <p>'I thought antibiotics would be effective in treating my symptoms'</p> <p>'I did not know what other treatments were available'</p>                                                               |
| Capability (physical)      | <p>'I felt too unwell to travel to the GP practice'</p>                                                                                                                                              |
| Opportunity (social)       | <p>'I was encouraged by others to go see my GP'</p> <p>'My GP discussed alternatives ways of managing my symptoms'</p> <p>'I was involved in the decision of whether or not to take antibiotics'</p> |
| Opportunity (physical)     | <p>'I was unable to take time off work to recover without taking antibiotics'</p> <p>'Other treatments were too expensive'</p> <p>'It was easy to get a GP appointment'</p>                          |
| Motivation (reflective)    | <p>'I felt confident in safely treating my symptoms without antibiotics'</p> <p>'I did not think I would get better as quickly without antibiotics'</p>                                              |
| Motivation (automatic)     | <p>'I was worried about my symptoms'</p> <p>'I always go see my GP when I have these types of symptoms'</p> <p>'I felt reassured that I could safely manage my symptoms without antibiotics'</p>     |

STROBE Statement—Checklist of items that should be included in reports of *cohort studies*

|                              | Item No | Recommendation                                                                                                                                                                                                     |
|------------------------------|---------|--------------------------------------------------------------------------------------------------------------------------------------------------------------------------------------------------------------------|
| <b>Title and abstract</b>    | 1       | (a) Indicate the study's design with a commonly used term in the title or the abstract <b>p1</b>                                                                                                                   |
|                              |         | (b) Provide in the abstract an informative and balanced summary of what was done and what was found <b>p2</b>                                                                                                      |
| <b>Introduction</b>          |         |                                                                                                                                                                                                                    |
| Background/rationale         | 2       | Explain the scientific background and rationale for the investigation being reported <b>p3</b>                                                                                                                     |
| Objectives                   | 3       | State specific objectives, including any prespecified hypotheses <b>p3</b>                                                                                                                                         |
| <b>Methods</b>               |         |                                                                                                                                                                                                                    |
| Study design                 | 4       | Present key elements of study design early in the paper <b>p3</b>                                                                                                                                                  |
| Setting                      | 5       | Describe the setting, locations, and relevant dates, including periods of recruitment, exposure, follow-up, and data collection <b>p3,4,5</b>                                                                      |
| Participants                 | 6       | (a) Give the eligibility criteria, and the sources and methods of selection of participants. Describe methods of follow-up <b>p3,4,5</b>                                                                           |
|                              |         | (b) For matched studies, give matching criteria and number of exposed and unexposed <b>NA</b>                                                                                                                      |
| Variables                    | 7       | Clearly define all outcomes, exposures, predictors, potential confounders, and effect modifiers. Give diagnostic criteria, if applicable <b>p4,5, Table 1, Table 2</b>                                             |
| Data sources/<br>measurement | 8*      | For each variable of interest, give sources of data and details of methods of assessment (measurement). Describe comparability of assessment methods if there is more than one group <b>p4,5, Table 1, Table 2</b> |
| Bias                         | 9       | Describe any efforts to address potential sources of bias <b>p5,6</b>                                                                                                                                              |
| Study size                   | 10      | Explain how the study size was arrived at <b>p3</b>                                                                                                                                                                |
| Quantitative variables       | 11      | Explain how quantitative variables were handled in the analyses. If applicable, describe which groupings were chosen and why <b>p5</b>                                                                             |
| Statistical methods          | 12      | (a) Describe all statistical methods, including those used to control for confounding                                                                                                                              |
|                              |         | (b) Describe any methods used to examine subgroups and interactions                                                                                                                                                |
|                              |         | (c) Explain how missing data were addressed                                                                                                                                                                        |
|                              |         | (d) If applicable, explain how loss to follow-up was addressed                                                                                                                                                     |
|                              |         | (e) Describe any sensitivity analyses                                                                                                                                                                              |
| <b>Results - NA</b>          |         |                                                                                                                                                                                                                    |
| Participants                 | 13*     | (a) Report numbers of individuals at each stage of study—eg numbers potentially eligible, examined for eligibility, confirmed eligible, included in the study, completing follow-up, and analysed                  |
|                              |         | (b) Give reasons for non-participation at each stage                                                                                                                                                               |
|                              |         | (c) Consider use of a flow diagram                                                                                                                                                                                 |
| Descriptive data             | 14*     | (a) Give characteristics of study participants (eg demographic, clinical, social) and information on exposures and potential confounders                                                                           |
|                              |         | (b) Indicate number of participants with missing data for each variable of interest                                                                                                                                |
|                              |         | (c) Summarise follow-up time (eg, average and total amount)                                                                                                                                                        |
| Outcome data                 | 15*     | Report numbers of outcome events or summary measures over time                                                                                                                                                     |
| Main results                 | 16      | (a) Give unadjusted estimates and, if applicable, confounder-adjusted estimates and their precision (eg, 95% confidence interval). Make clear which confounders were adjusted for and why they were included       |

|                          |    |                                                                                                                                                                            |
|--------------------------|----|----------------------------------------------------------------------------------------------------------------------------------------------------------------------------|
|                          |    | (b) Report category boundaries when continuous variables were categorized                                                                                                  |
|                          |    | (c) If relevant, consider translating estimates of relative risk into absolute risk for a meaningful time period                                                           |
| Other analyses           | 17 | Report other analyses done—eg analyses of subgroups and interactions, and sensitivity analyses                                                                             |
| <b>Discussion - NA</b>   |    |                                                                                                                                                                            |
| Key results              | 18 | Summarise key results with reference to study objectives                                                                                                                   |
| Limitations              | 19 | Discuss limitations of the study, taking into account sources of potential bias or imprecision. Discuss both direction and magnitude of any potential bias                 |
| Interpretation           | 20 | Give a cautious overall interpretation of results considering objectives, limitations, multiplicity of analyses, results from similar studies, and other relevant evidence |
| Generalisability         | 21 | Discuss the generalisability (external validity) of the study results                                                                                                      |
| <b>Other information</b> |    |                                                                                                                                                                            |
| Funding                  | 22 | Give the source of funding and the role of the funders for the present study and, if applicable, for the original study on which the present article is based p8           |

\*Give information separately for exposed and unexposed groups.

**Note:** An Explanation and Elaboration article discusses each checklist item and gives methodological background and published examples of transparent reporting. The STROBE checklist is best used in conjunction with this article (freely available on the Web sites of PLoS Medicine at <http://www.plosmedicine.org/>, Annals of Internal Medicine at <http://www.annals.org/>, and Epidemiology at <http://www.epidem.com/>). Information on the STROBE Initiative is available at <http://www.strobe-statement.org>.
